# Supplementary material for: The Role of Attitudes, Norms, and Efficacy on Shifting COVID-19 Vaccine Intentions: A Longitudinal Study of COVID-19 Vaccination Intentions in New Zealand
Source: MDPI journal article supplement (doi:10.3390/vaccines9101132), 2021-10-04
Supplement: s1 [file s1]

**Supplementary Table S1.** Likelihood Ratio Tests for multinomial logistic regression with 'Yes, Definitely' get a vaccine as reference category and using all other variables categorical.

| Effect                                    | Likelihood Ratio Tests |                      |                                    |                        |    |       |
|-------------------------------------------|------------------------|----------------------|------------------------------------|------------------------|----|-------|
|                                           | Model Fitting Criteria |                      |                                    | Likelihood Ratio Tests |    |       |
|                                           | AIC of Reduced Model   | BIC of Reduced Model | -2 Log Likelihood of Reduced Model | Chi-Square             | df | Sig.  |
| Intercept                                 | 889.901                | 1400.101             | 661.901                            | 0                      | 0  | .     |
| Gender                                    | 886.587                | 1383.36              | 664.587                            | 2.685                  | 3  | 0.443 |
| Age                                       | 867.269                | 1310.337             | 669.269                            | 7.367                  | 15 | 0.947 |
| Education                                 | 875.418                | 1345.339             | 665.418                            | 3.517                  | 9  | 0.94  |
| Income                                    | 876.63                 | 1319.698             | 678.63                             | 16.729                 | 15 | 0.335 |
| Ethnicity                                 | 878.713                | 1348.633             | 668.713                            | 6.811                  | 9  | 0.657 |
| Attitudes towards COVID-19 vaccine Wave 1 | 901.332                | 1398.105             | 679.332                            | 17.431                 | 3  | 0.001 |
| Descriptive norm                          | 876.859                | 1333.353             | 672.859                            | 10.957                 | 12 | 0.533 |
| Subjective norm                           | 878.559                | 1335.053             | 674.559                            | 12.658                 | 12 | 0.394 |
| Injunctive norm                           | 875.395                | 1331.889             | 671.395                            | 9.494                  | 12 | 0.66  |
| Self-efficacy                             | 886.573                | 1343.067             | 682.573                            | 20.671                 | 12 | 0.055 |
| COVID-19 vaccine intention (March 2021)   | 948.332                | 1418.253             | 738.332                            | 76.431                 | 9  | 0     |
| Pseudo R-Square                           |                        |                      |                                    |                        |    |       |
| Cox and Snell                             | 0.617                  |                      |                                    |                        |    |       |
| Nagelkerke                                | 0.716                  |                      |                                    |                        |    |       |
| McFadden                                  | 0.485                  |                      |                                    |                        |    |       |

**Supplementary Table S2.** Multinomial logistic regression with 'Yes, Definitely' get a vaccine as reference category and using all other variables categorical.

|                                                    | Unsure, but leaning towards<br>YES |        |            |      | Unsure, but leaning<br>towards NO |        |        |      | No, definitely not |        |         |      |
|----------------------------------------------------|------------------------------------|--------|------------|------|-----------------------------------|--------|--------|------|--------------------|--------|---------|------|
|                                                    | Exp(B)                             | 95% CI |            | Sig. | Exp(B)                            | 95% CI |        | Sig. | Exp(B)             | 95% CI |         | Sig. |
| Male                                               | 0.91                               | 0.50   | 1.67       | 0.77 | 0.53                              | 0.22   | 1.30   | 0.17 | 0.50               | 0.17   | 1.48    | 0.21 |
| Female (reference)                                 |                                    |        |            |      |                                   |        |        |      |                    |        |         |      |
| 18-25                                              | 1.89                               | 0.58   | 6.15       | 0.29 | 1.92                              | 0.28   | 13.01  | 0.51 | 2.32               | 0.24   | 22.24   | 0.47 |
| 26-35                                              | 1.77                               | 0.64   | 4.88       | 0.27 | 1.69                              | 0.35   | 8.23   | 0.52 | 1.57               | 0.23   | 10.65   | 0.65 |
| 36-45                                              | 2.24                               | 0.76   | 6.60       | 0.14 | 3.03                              | 0.60   | 15.43  | 0.18 | 5.16               | 0.75   | 35.63   | 0.10 |
| 46-55                                              | 1.39                               | 0.53   | 3.60       | 0.50 | 1.50                              | 0.33   | 6.73   | 0.60 | 2.60               | 0.44   | 15.52   | 0.30 |
| 56-65                                              | 1.02                               | 0.36   | 2.87       | 0.97 | 1.68                              | 0.37   | 7.64   | 0.50 | 3.25               | 0.54   | 19.52   | 0.20 |
| 66 and above (reference)                           | .                                  | .      | .          | .    | .                                 | .      | .      | .    | .                  | .      | .       | .    |
| No qualification                                   | 1.31                               | 0.38   | 4.51       | 0.67 | 2.45                              | 0.45   | 13.29  | 0.30 | 2.60               | 0.33   | 20.73   | 0.37 |
| School qualification                               | 1.37                               | 0.59   | 3.18       | 0.47 | 1.05                              | 0.30   | 3.66   | 0.94 | 1.97               | 0.43   | 9.03    | 0.39 |
| Tertiary diplomas/Certificates                     | 1.15                               | 0.53   | 2.48       | 0.72 | 1.08                              | 0.36   | 3.27   | 0.90 | 0.98               | 0.22   | 4.33    | 0.98 |
| Bachelor's degree or higher (reference)            | .                                  | .      | .          | .    | .                                 | .      | .      | .    | .                  | .      | .       | .    |
| Less than \$19,999                                 | 1.26                               | 0.40   | 4.00       | 0.70 | 0.52                              | 0.10   | 2.65   | 0.43 | 0.55               | 0.08   | 3.88    | 0.55 |
| \$20,000 to \$39,999                               | 1.46                               | 0.47   | 4.58       | 0.52 | 0.73                              | 0.14   | 3.87   | 0.71 | 1.32               | 0.20   | 8.80    | 0.78 |
| \$40,000 to \$59,999                               | 1.17                               | 0.38   | 3.57       | 0.79 | 1.55                              | 0.33   | 7.36   | 0.58 | 0.77               | 0.12   | 5.07    | 0.79 |
| \$60,000 to \$79,999                               | 2.21                               | 0.75   | 6.53       | 0.15 | 0.86                              | 0.18   | 4.27   | 0.86 | 3.41               | 0.53   | 22.01   | 0.20 |
| \$80,000 to \$99,999                               | 2.04                               | 0.57   | 7.30       | 0.27 | 2.87                              | 0.42   | 19.81  | 0.28 | 0.01               | 0.00   | 0.01    | 1.00 |
| \$100,000 and over (reference)                     | .                                  | .      | .          | .    | .                                 | .      | .      | .    | .                  | .      | .       | .    |
| European New Zealander                             | 1.91                               | 0.81   | 4.50       | 0.14 | 1.44                              | 0.41   | 5.10   | 0.58 | 3.62               | 0.65   | 20.25   | 0.14 |
| Māori                                              | 2.00                               | 0.66   | 6.12       | 0.22 | 1.44                              | 0.28   | 7.33   | 0.66 | 1.51               | 0.16   | 14.24   | 0.72 |
| Pasifika                                           | 1.94                               | 0.42   | 9.04       | 0.40 | 0.84                              | 0.10   | 7.10   | 0.87 | 0.48               | 0.03   | 8.06    | 0.61 |
| Asian or Another (reference)                       | .                                  | .      | .          | .    | .                                 | .      | .      | .    | .                  | .      | .       | .    |
| Attitudes towards COVID-19 vaccine Wave 1          | 0.67                               | 0.51   | 0.88       | 0.00 | 0.47                              | 0.32   | 0.69   | 0.00 | 0.62               | 0.40   | 0.98    | 0.04 |
| Descriptive norm (1= strongly disagree)            | 7.98                               | 0.19   | 327.8<br>1 | 0.27 | 5.91                              | 0.07   | 498.96 | 0.43 | 20.61              | 0.31   | 1371.83 | 0.16 |
|                                                    | 2.32                               | 0.45   | 11.85      | 0.31 | 1.14                              | 0.10   | 12.98  | 0.91 | 1.90               | 0.15   | 24.43   | 0.62 |
|                                                    | 2.45                               | 0.72   | 8.35       | 0.15 | 1.71                              | 0.21   | 13.88  | 0.61 | 0.37               | 0.03   | 4.01    | 0.41 |
|                                                    | 1.89                               | 0.67   | 5.32       | 0.23 | 1.32                              | 0.20   | 8.45   | 0.77 | 0.65               | 0.08   | 5.15    | 0.69 |
| Descriptive norm (5= strongly agree),<br>reference | .                                  | .      | .          | .    | .                                 | .      | .      | .    | .                  | .      | .       | .    |
| Subjective norm (1 = Strongly disagree)            | 0.83                               | 0.03   | 27.44      | 0.92 | 0.01                              | 0.00   | 0.67   | 0.03 | 0.04               | 0.00   | 3.57    | 0.16 |
|                                                    | 1.08                               | 0.21   | 5.55       | 0.93 | 0.25                              | 0.03   | 2.22   | 0.21 | 0.90               | 0.07   | 12.26   | 0.94 |
|                                                    | 1.98                               | 0.55   | 7.07       | 0.30 | 0.44                              | 0.07   | 2.89   | 0.39 | 4.84               | 0.49   | 47.87   | 0.18 |
|                                                    | 1.55                               | 0.57   | 4.23       | 0.39 | 0.60                              | 0.12   | 2.94   | 0.53 | 1.65               | 0.18   | 15.28   | 0.66 |

|                                                    |       |      |        |      |       |      |        |      |       |      |        |      |
|----------------------------------------------------|-------|------|--------|------|-------|------|--------|------|-------|------|--------|------|
| Subjective norm (5 = Strongly agree),<br>reference | .     | .    | .      | .    | .     | .    | .      | .    | .     | .    | .      | .    |
| Injunctive norm (1 = Strongly disagree)            | 0.01  | 0.01 | 0.01   | .    | 0.50  | 0.02 | 14.45  | 0.69 | 0.98  | 0.07 | 13.97  | 0.99 |
|                                                    | 0.45  | 0.08 | 2.45   | 0.35 | 0.44  | 0.05 | 3.86   | 0.46 | 0.55  | 0.04 | 7.08   | 0.64 |
|                                                    | 0.84  | 0.31 | 2.30   | 0.74 | 2.28  | 0.52 | 9.92   | 0.27 | 1.08  | 0.18 | 6.34   | 0.93 |
|                                                    | 0.73  | 0.31 | 1.75   | 0.48 | 1.42  | 0.37 | 5.50   | 0.61 | 0.76  | 0.14 | 4.08   | 0.75 |
| Injunctive norm (5= Strongly agree),<br>reference  | .     | .    | .      | .    | .     | .    | .      | .    | .     | .    | .      | .    |
| Self-efficacy (1 = Strongly disagree)              | 10.52 | 1.50 | 73.69  | 0.02 | 38.60 | 2.10 | 711.08 | 0.01 | 18.45 | 1.40 | 242.64 | 0.03 |
|                                                    | 9.60  | 2.42 | 38.16  | 0.00 | 15.50 | 1.05 | 229.07 | 0.05 | 3.87  | 0.34 | 44.41  | 0.28 |
|                                                    | 4.15  | 1.27 | 13.55  | 0.02 | 7.17  | 0.56 | 92.54  | 0.13 | 2.53  | 0.23 | 27.96  | 0.45 |
|                                                    | 3.31  | 1.20 | 9.10   | 0.02 | 3.45  | 0.30 | 39.70  | 0.32 | 2.65  | 0.29 | 24.10  | 0.39 |
| Self-efficacy (5 = Strongly agree), reference      | .     | .    | .      | .    | .     | .    | .      | .    | .     | .    | .      | .    |
| COVID-19 vaccine intention (March 2021)            |       |      |        |      |       |      |        |      |       |      |        |      |
| Yes, definitely                                    | 4.83  | 0.45 | 51.94  | 0.19 | 0.09  | 0.01 | 1.08   | 0.06 | 0.03  | 0.00 | 0.47   | 0.01 |
| Unsure, but leaning towards Yes                    | 24.61 | 2.51 | 241.38 | 0.01 | 0.51  | 0.07 | 3.68   | 0.50 | 0.10  | 0.01 | 1.03   | 0.05 |
| Unsure, but leaning towards No                     | 17.86 | 1.86 | 171.16 | 0.01 | 5.83  | 0.95 | 35.91  | 0.06 | 0.40  | 0.06 | 2.96   | 0.37 |
| No, definitely not (reference)                     | .     | .    | .      | .    | .     | .    | .      | .    | .     | .    | .      | .    |

Note. N = 650. The reference category is 'Yes, definitely'.

**Supplementary Table S3.** Multiple regression predicting intention to get a COVID-19 vaccine in wave 2 in the 5 imputed datasets and pooled results.

|                                         | Model 1  |           |      | Model 2  |           |      | Model 3  |           |      | Model 4  |           |      | Model 5  |           |      | Pooled   |           |      |
|-----------------------------------------|----------|-----------|------|----------|-----------|------|----------|-----------|------|----------|-----------|------|----------|-----------|------|----------|-----------|------|
|                                         | <i>B</i> | <i>SE</i> | Sig. |
| (Constant)                              | 1.81     | 0.21      | 0.00 | 1.80     | 0.22      | 0.00 | 1.53     | 0.21      | 0.00 | 1.61     | 0.22      | 0.00 | 1.37     | 0.22      | 0.00 | 1.62     | 0.30      | 0.00 |
| Vaccine attitudes                       | -0.11    | 0.02      | 0.00 | -0.09    | 0.02      | 0.00 | -0.07    | 0.02      | 0.00 | -0.08    | 0.02      | 0.00 | -0.08    | 0.02      | 0.00 | -0.09    | 0.03      | 0.00 |
| Descriptive norm                        | -0.04    | 0.03      | 0.17 | 0.04     | 0.03      | 0.17 | -0.04    | 0.03      | 0.14 | -0.04    | 0.03      | 0.17 | -0.04    | 0.03      | 0.21 | -0.02    | 0.05      | 0.64 |
| Subjective norm                         | 0.06     | 0.03      | 0.05 | 0.03     | 0.03      | 0.43 | 0.08     | 0.03      | 0.01 | 0.09     | 0.03      | 0.00 | 0.11     | 0.03      | 0.00 | 0.07     | 0.05      | 0.14 |
| Injunctive norm                         | 0.00     | 0.03      | 0.97 | 0.02     | 0.03      | 0.52 | 0.02     | 0.03      | 0.56 | -0.10    | 0.03      | 0.00 | -0.03    | 0.03      | 0.31 | -0.02    | 0.06      | 0.76 |
| Self-efficacy                           | -0.14    | 0.03      | 0.00 | -0.22    | 0.03      | 0.00 | -0.17    | 0.03      | 0.00 | -0.07    | 0.03      | 0.01 | -0.12    | 0.03      | 0.00 | -0.14    | 0.06      | 0.07 |
| COVID-19 vaccine intention (March 2021) | 0.46     | 0.03      | 0.00 | 0.44     | 0.04      | 0.00 | 0.47     | 0.04      | 0.00 | 0.54     | 0.04      | 0.00 | 0.48     | 0.04      | 0.00 | 0.48     | 0.06      | 0.00 |
| $\Delta R^2$                            | 0.604    |           |      | 0.560    |           |      | 0.563    |           |      | 0.568    |           |      | 0.515    |           |      |          |           |      |

Note: N=1083. *B*=Unadjusted regression coefficient, *SE* = Standard Error, Sig. = Significance. The models above are adjusted for gender, age, education, income, ethnicity, and political ideology. Multiple imputation was used to generate 5 imputed datasets ( $n=6498$ ). Imputation models included other wave 1 variables used in the analysis such as attitudes, norms, efficacy, and intentions to get a COVID-19 vaccine.
